# Supplementary material for: Two Distinct Regulatory Systems Control Pulcherrimin Biosynthesis in Bacillus subtilis
Source: PubMed Central journal article supplement — bioRxiv. 2024 Jan 4:2024.01.03.574033. Preprint. [Version 1] doi: 10.1101/2024.01.03.574033 (PMC10802322; doi:10.1101/2024.01.03.574033), 2024-01-04
Supplement: media-1.pdf [file media-1.pdf]

**S1 Table.** Strains Used in this Study.

| Strain | Genotype                                                   | Selection |
|--------|------------------------------------------------------------|-----------|
| DK1042 | <i>B. subtilis</i> NCBI 3610 ComI <sup>Q12L</sup>          | -         |
| NF057  | <i>scoC::erm</i>                                           | MLS       |
| NF062  | <i>yvmC::kan</i>                                           | Kan       |
| NF064  | <i>scoC::erm abrB::kan</i>                                 | MLS Kan   |
| NF077  | <i>abrB::kan</i>                                           | Kan       |
| NF079  | $\Delta pchR$ <i>abrB::kan</i>                             | Kan       |
| NF081  | $\Delta pchR$                                              | -         |
| NF088  | $\Delta pchR$ <i>scoC::erm</i>                             | MLS       |
| NF089  | <i>scoC::erm yvmC::kan</i>                                 | MLS Kan   |
| NF092  | $\Delta pchR$ <i>scoC::cam abrB::erm</i>                   | Cam Erm   |
| NF093  | <i>scoC::erm lacA::pscoC-scoC</i>                          | Cam Erm   |
| NF102  | WT <i>amyE::pYvmC-GFP</i>                                  | Cam       |
| NF103  | <i>scoC::erm amyE::pYvmC-GFP</i>                           | Cam Erm   |
| NF104  | $\Delta pchR$ <i>amyE::pYvmC-GFP</i>                       | Cam       |
| NF105  | $\Delta pchR$ <i>scoC::erm amyE::pYvmC-GFP</i>             | Cam Erm   |
| NF117  | <i>abrB::kan amyE::pYvmC-GFP</i>                           | Kan Cam   |
| NF106  | $\Delta pchR$ <i>abrB::kan amyE::pYvmC-GFP</i>             | Kan Cam   |
| NF107  | $\Delta pchR \Delta scoC$ <i>abrB::erm amyE::pYvmC-GFP</i> | Erm Cam   |

**S2 Table.** DNA fragments and Plasmids Used in this Study.

| Name     | Description                                                        | Resistance |
|----------|--------------------------------------------------------------------|------------|
| fNLF001  | <i>abrB::erm</i> with flanking homologous regions                  | Erm        |
| fNLF003  | <i>pchR::erm</i> with flanking homologous regions                  | Erm        |
| fNLF005  | <i>yvmC::kan</i> with flanking homologous regions                  | Kan        |
| fNLF011  | <i>yvmC::erm</i> with flanking homologous regions                  | Erm        |
| fNLF015  | <i>scoC::camR-pscoC-FLAG-ScoC</i> with flanking homologous regions | Cam        |
| fNLF016  | <i>scoC::camR</i> with flanking homologous regions                 | Cam        |
| pNF035   | <i>pYvmC</i> in pDR110                                             | Spec       |
| pNF038   | <i>lacA::pscoC-ScoC</i>                                            | Cam        |
| pNF039   | <i>PchR</i> in pE-SUMO                                             | Kan        |
| pNF040   | <i>AbrB</i> in pE-SUMO                                             | Kan        |
| pTMN007# | <i>ScoC</i> in pE-SUMO                                             | Kan        |
| pNF047   | <i>pYvmC</i> in pGFP-Star                                          | Cam        |

# - see [25].

**S3 Table.** Oligonucleotides Used in this Study.

| Name     | Primer Description/Use                  | Sequence (5'-3')                                       | Amplicon Description                                                      |
|----------|-----------------------------------------|--------------------------------------------------------|---------------------------------------------------------------------------|
| oNLF336  | abrB_KO_US_For                          | atagtatttcagaagacgatccgc                               | AbrB::AbR disruption                                                      |
| oNLF337  | abrB_KO_US_Rev                          | ctctccttctcgctgccattctctccaagagata                     |                                                                           |
| oNLF338  | abrB_KO_DS_For                          | gcagtgacaggagcctcgtaatcatttctgtacaaaa                  |                                                                           |
| oNLF339  | abrB_KO_DS_Rev                          | aatgtaaggacaatagctggtatgc                              |                                                                           |
| oNLF340  | pchR_KO_US_For                          | tactgatcttctacccagcttc                                 | PchR::AbR disruption                                                      |
| oNLF341  | pchR_KO_US_Rev                          | ctctccttctcgctgccataggctaccttcttctt                    |                                                                           |
| oNLF342  | pchR_KO_DS_For                          | gcagtgacaggagcctcgtaaacaanaaggcggtgtac                 |                                                                           |
| oNLF343  | pchR_KO_DS_Rev                          | cattgtgagcaagtaggcagatac                               |                                                                           |
| oNLF344  | yvmC_KO_US_For                          | tcggtttgttctgctcaagt                                   | YvmC::AbR disruption                                                      |
| oNLF345  | yvmC_KO_US_Rev                          | ctctccttctcgctgccatctcattcacccctaaaa                   |                                                                           |
| oNLF346  | yvmC_KO_DS_For                          | gcagtgacaggagcctcgtagatagggggagtaaacat                 |                                                                           |
| oNLF347  | yvmC_KO_DS_Rev                          | gtcaggctgttcaaatgcttc                                  |                                                                           |
| oNLF356  | AbR_KO_For                              | gcaggcgagaaaggagag                                     | AbR Amplification                                                         |
| oNLF357  | AbR_KO_Rev                              | cgaggctcctgtcactgc                                     |                                                                           |
| oNLF432  | pNF035_For_FAM                          | gctgcaggaattcgactctc                                   | 5' FAM and 5' IRD700 probe (WT and Δ59) for DNase I footprinting and EMSA |
| oNLF433  | pNF035_For_IRD700                       | gctgcaggaattcgactctc                                   |                                                                           |
| oNLF387  | yvmC_promoter_reverse_pNF035            | catgtttgtcctccttattagttaatcagctagctccggatcatctcattcacc |                                                                           |
| oLVG025A | Amplifies pDR110 backbone, with oNLF467 | ctcttgccagtcacgttacg                                   |                                                                           |
| oNLF467  | yvmC_Δ59_us_rev                         | taataatcatttccacaaacgcaatatgatctgtg                    |                                                                           |
| oNLF468  | yvmC_Δ59_ds_for                         | catattgacgtttggtgaaaatgattataaaatcttaaaaaacatttg       |                                                                           |
| oNLF407  | scoC_us_fwd                             | ctatcgctcagctttattgatc                                 | scoC::cam disruption                                                      |
| oNLF408  | scoC_us_rev                             | cgctctccttctcgctgccattacgtcacctgcttc                   |                                                                           |
| oNLF409  | camR_fwd                                | gcaggcgagaaaggagagcgtcaggtggcacttttcg                  |                                                                           |
| oNLF410  | camR_rev                                | cgaggctcctgtcactgcgacattagaaaaccgactgtaaaaag           |                                                                           |

**S3 Table Cont.** Oligonucleotides Used in this Study.

|         |                     |                                                        |                                                  |
|---------|---------------------|--------------------------------------------------------|--------------------------------------------------|
| oNLF411 | scoC_ds_fwd         | tcgcagtgacaggagcctcgaagagctcgaacctgtaaac               |                                                  |
| oNLF412 | scoC_ds_rev         | aacaagaatatccaagccg                                    |                                                  |
| oNLF471 | lacA_US_For_pBR332  | gtaatgataccgatgaaacgagagggcgggacagatacctcg             | Native ScoC<br>complementation<br>at <i>lacA</i> |
| oNLF472 | lacA_US_Rev_pBR332  | gtgccacctgactcacattctcctcctgttc                        |                                                  |
| oNLF473 | CamR_for_lacA       | aggagaatgtgagtcaggtggcacttttcg                         |                                                  |
| oNLF474 | pscoC-ScoC_rev_lacA | cggagcatcagcttaactgtttacaggttcg                        |                                                  |
| oNLF475 | lacA_ds_for_pBR332  | gtaaacagttaagctgatgctccgctcgatatg                      |                                                  |
| oNLF476 | lacA_ds_rev_pBR332  | acctacatctgtattaacgaagcggcctccattacatctcttactgc        |                                                  |
| oNLF495 | abrB_pET-SUMO_for   | attgaggctcaccggaacagattggaggtatgaaatctactggtattgtac    | AbrB Purification<br>Vector                      |
| oNLF496 | abrB_pET-SUMO_rev   | gatctcagtggtggtggtggtggtgctcgattattaaggtttgaagctg      |                                                  |
| oNLF497 | pchR_pET-SUMO_for   | attgaggctcaccggaacagattggaggtatgtctgatttgacaaaacag     | PchR<br>Purification<br>Vector                   |
| oNLF498 | pchR_pET-SUMO_rev   | gatctcagtggtggtggtggtggtgctcgattactttacaggtttgtctg     |                                                  |
| oNLF524 | yvmC_upstream_for   | ttacagtcattttaccgcggttcccatgtgatgtttacattttttcaaattttg | pyvmC-GFP<br>integration<br>vector               |
| oNLF525 | yvmC_upstream_rev   | cgttaccattccggtcttatcccgtttaagtc                       |                                                  |
| oNLF526 | yvmC_downstream_for | ttaaagcgggataagaccggaatggaacggaaag                     |                                                  |
| oNLF527 | yvmC_downstream_rev | ctattgaatccatagtagttcctcctccctaaattgagctttcgccc        |                                                  |
