# Supplementary material for: Two Distinct Regulatory Systems Control Pulcherrimin Biosynthesis in Bacillus subtilis
Source: PubMed Central journal article supplement — bioRxiv. 2024 Jan 4:2024.01.03.574033. Preprint. [Version 1] doi: 10.1101/2024.01.03.574033 (PMC10802322; doi:10.1101/2024.01.03.574033), 2024-01-04
Supplement: NIHPP2024.01.03.574033V1-supplement-1.pdf [file NIHPP2024.01.03.574033V1-supplement-1.pdf]

941

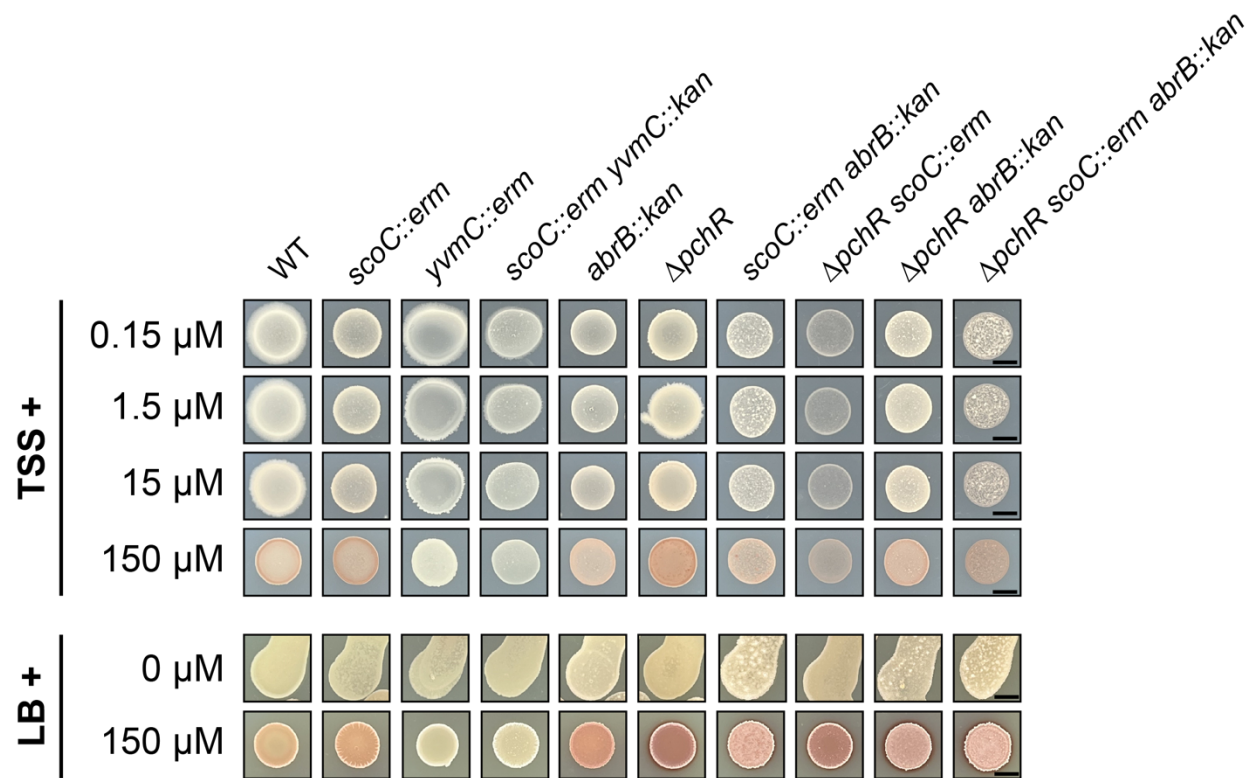

942

943 **S1 Fig.:** Iron Supplementation Influences Pulcherrimin Phenotype in WT and isogenic  
944 mutants of *Bacillus subtilis*.

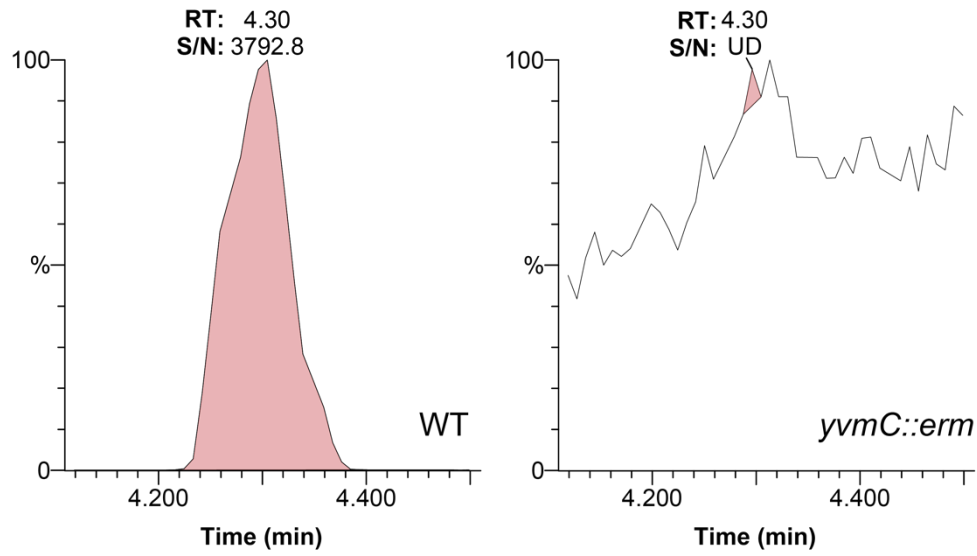

945 **S2 Fig.:** Cyclo-(L-leucine-L-leucine) Detection from WT and *yvmC::erm* Backgrounds.  
946  
947  
948

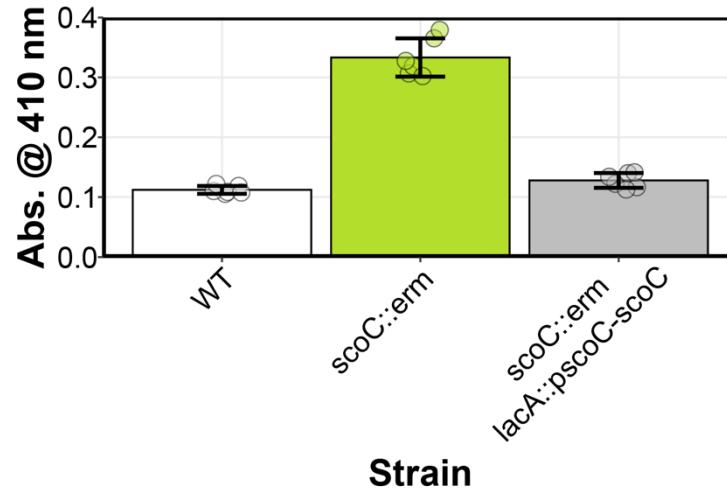

949 **S3 Fig.:** Complementation of scoC::erm Restores WT Pulcherrimin Phenotype.  
950

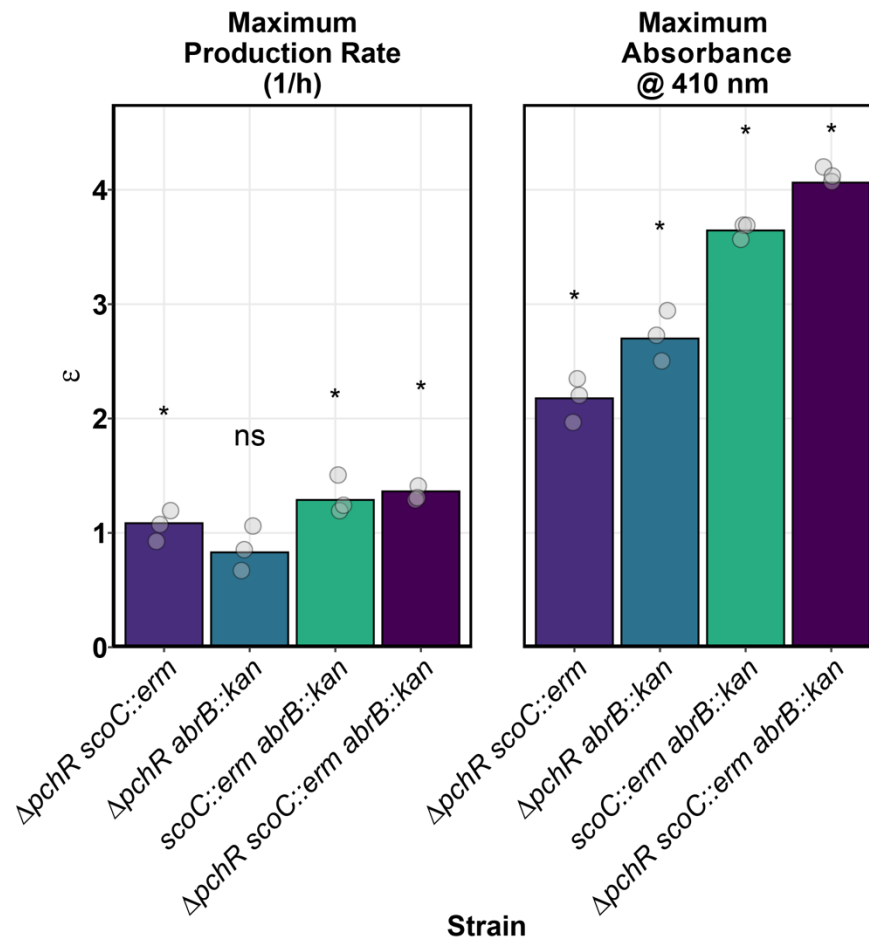

951  
952  
953  
954  
955

**S4 Fig.:** Epistasis analysis for estimated maximum production rate ( $\mu_{max}$ , right) and pulcherrimn carrying capacity ( $K$ , right).

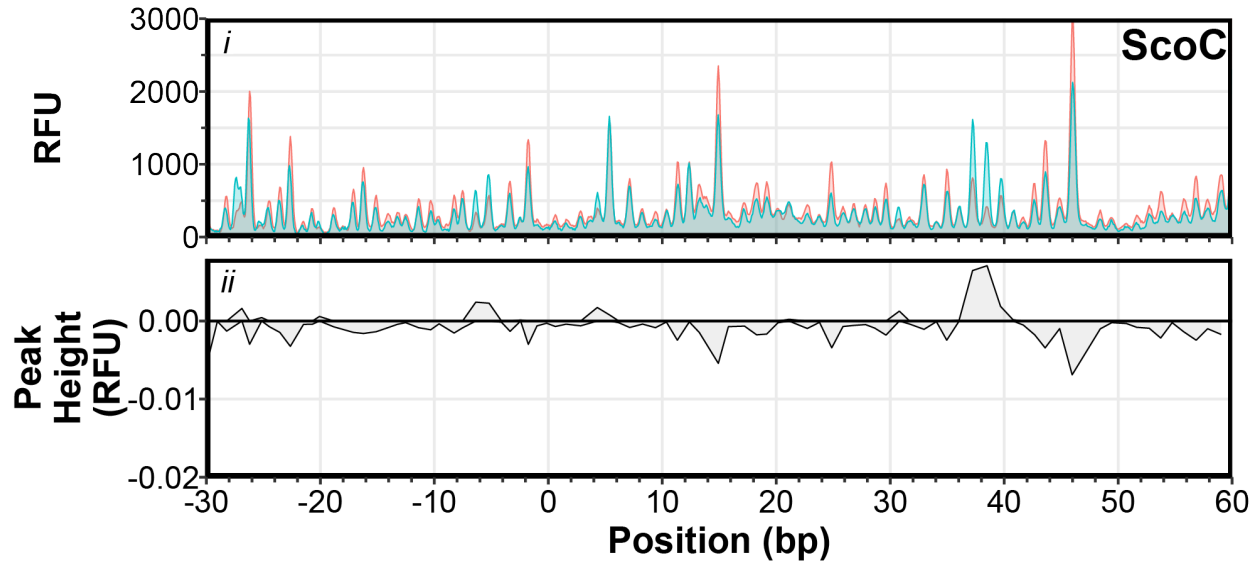

956  
957  
958  
959  
960

**S5 Fig.:** Addition of Heparin Abolishes ScoC-DNA Complexes.
